# NEW TITLES from AMERICAN PSYCHIATRIC ASSOCIATION PUBLISHING

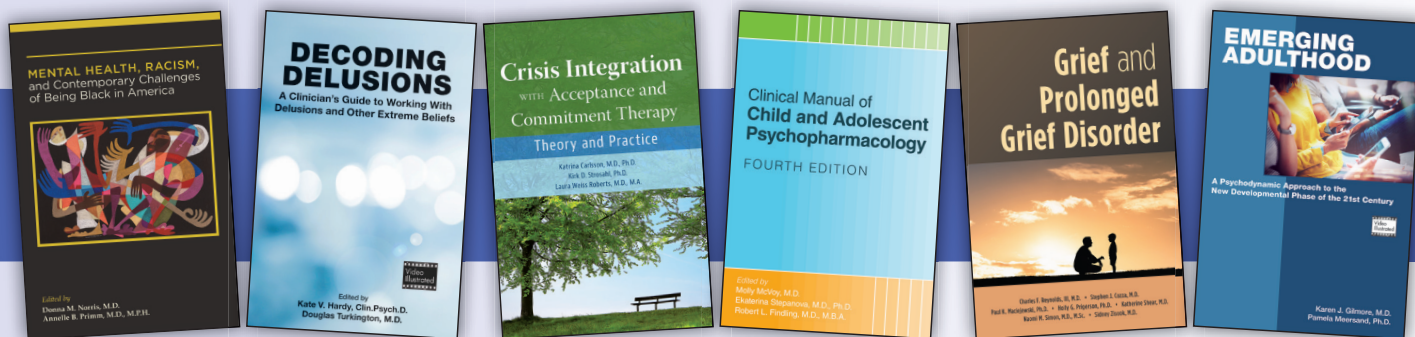

## Mental Health, Racism, and Contemporary Challenges of Being Black in America

Edited by Donna M. Norris, M.D., and Annelle B. Primm, M.D., M.P.H.

More than four decades of perspectives from the American Psychiatric Association's Solomon Carter Fuller Award lectures, are collected for the first time in this seminal anthology. The chapter authors—Solomon Carter Fuller awardees themselves—provide a multidisciplinary, cross-sectional examination of the historical, current, and future societal context that informs the Black experience in the United States.

2024 • 334 pages • ISBN 978-1-61537-470-0 • Hardcover • \$55.00 • Item #37470  
2024 • 334 pages • ISBN 978-1-61537-471-7 • eBook • \$44.00 • Item #37471

*Video Illustrated!*

## Decoding Delusions A Clinician's Guide to Working With Delusions and Other Extreme Beliefs

Edited by Kate V. Hardy, Clin.Psych.D., and Douglas Turkington, M.D.

*Decoding Delusions* offers clinicians an up-to-date, culturally informed, and illustrated guide to managing the full range of delusions and other extreme beliefs encountered in daily practice. Authors lend their expert insights on a range of interventions for delusional presentations that include persecutory paranoia, erotomania, Capgras syndrome, and delusions of thought possession. Links to video clips help bring these treatment modalities to life and demonstrate key skills.

2024 • 448 pages • ISBN 978-1-61537-295-9 • Paperback • \$75.00 • Item #37295  
2024 • 448 pages • ISBN 978-1-61537-296-6 • eBook • \$60.00 • Item #37296

## Crisis Integration With Acceptance and Commitment Therapy Theory and Practice

Katrina Carlsson, M.D., Ph.D., Kirk D. Strosahl, Ph.D., and  
Laura Weiss Roberts, M.D., M.A.

Deftly combining crisis science, evolutionary psychology, neuroscience, and behavioral psychology, this book provides mental health clinicians with an approach to helping patients deal with crises and grow through them. This volume examines the findings from the scientific study of crisis, offering readers a translational and functional definition of a crisis and tying the acceptance and commitment therapy (ACT) model to the literature.

2024 • 252 pages • ISBN 978-1-61537-325-3 • Paperback • \$62.00 • Item #37325  
2024 • 252 pages • ISBN 978-1-61537-404-5 • eBook • \$50.00 • Item #37404

## Clinical Manual of Child and Adolescent Psychopharmacology, Fourth Edition

Edited by Molly McVoy, M.D., Ekaterina Stepanova, M.D., Ph.D., and  
Robert L. Findling, M.D., M.B.A.

Updated to include a succinct yet thorough review of the most recent evidence-based information and data-driven best treatment practices in child and adolescent psychiatry, this new volume is organized by DSM-5-TR diagnosis and offers an exhaustive analysis of the use of drugs in nine disorder categories that include depressive disorders, attention-deficit/hyperactivity disorder, autism spectrum disorder, eating disorders, and early schizophrenia and psychotic illnesses.

2024 • 524 pages • ISBN 978-1-61537-489-2 • Paperback • \$83.00 • Item #37489  
2024 • 524 pages • ISBN 978-1-61537-490-8 • eBook • \$66.00 • Item #37490

## Grief and Prolonged Grief Disorder

Edited by Charles F. Reynolds III, M.D., Stephen J. Cozza, M.D.,  
Paul K. Maciejewski, Ph.D., Holly G. Prigerson, Ph.D., M. Katherine Shear, M.D.,  
Naomi Simon, M.D., MSc, and Sidney Zisook, M.D.

This new handbook provides readers with a science-based approach to identifying and addressing both “normal” grief and PGD itself. Rife with illustrative clinical vignettes that help explain the concept of bereavement, the ways that grief presents across the life cycle, the epidemiology of PGD, and the impact of cultural factors on the experience of grief, the book gives readers the tools they need to recognize grief in themselves and others, strategies for the clinical management of typical grief, guidance on the specific treatment for PGD.

2024 • 222 pages • ISBN 978-1-61537-463-2 • Paperback • \$62.00 • Item #37463  
2024 • 222 pages • ISBN 978-1-61537-464-9 • eBook • \$50.00 • Item #37464

*Video Illustrated!*

## Emerging Adulthood A Psychodynamic Approach to the New Developmental Phase of the 21st Century

Karen J. Gilmore, M.D., and Pamela Meersand, Ph.D.

This new volume posits that it is most useful to examine late adolescence (ages 18–23) and emerging adulthood (ages 24–29) separately, given the differences in developmental capacities, tasks, achievements, and attitudes. With case vignettes, videos, and key points for each chapter, this book examines the process of identity formation; the role of youth culture in aiding individuation from family of origin; the distinction between typical emotional reactions and behaviors and those that require mental health interventions; and a diverse range of treatment modalities.

2024 • 324 pages • ISBN 978-1-61537-419-9 • Paperback • \$74.00 • Item #37419  
2024 • 324 pages • ISBN 978-1-61537-420-5 • eBook • \$59.00 • Item #37420

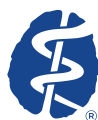

Source: https://focus.psychiatryonline.org/doi/suppl/10.1176/foc.2024.22.issue-1/suppl_file/back.pdf
