WINTER 2024 | VOLUME 22 | NUMBER 1

# Focus

The Journal of Lifelong Learning in Psychiatry

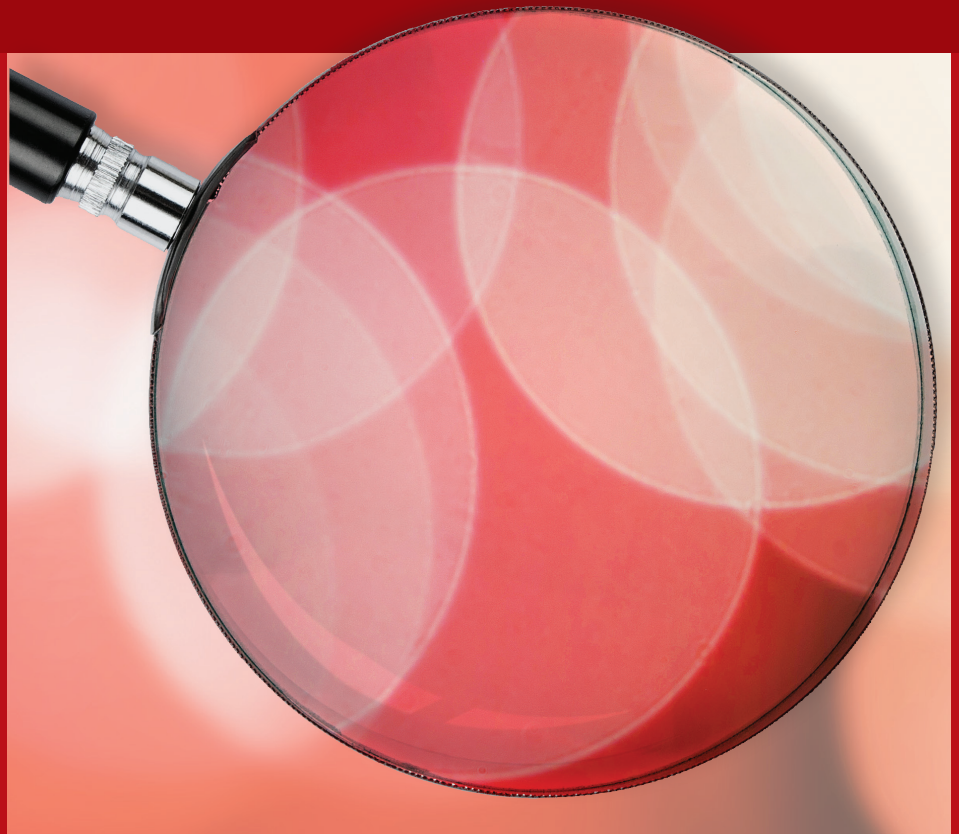

## Reproductive Psychiatry: Postpartum Depression is Only the Tip of the Iceberg

Guest Editors: C. Neill Epperson, M.D., Sarah Nagle-Yang, M.D.,  
and Andrew Novick, M.D., Ph.D.

AMERICAN  
PSYCHIATRIC  
ASSOCIATION 

[focus.psychiatryonline.org](http://focus.psychiatryonline.org)
